# Supplementary material for: Interrogating domain-domain interactions with parsimony based approaches
Source: Springer Nature journal article supplement (doi:10.1186/1471-2105-9-171), 2008-03-26

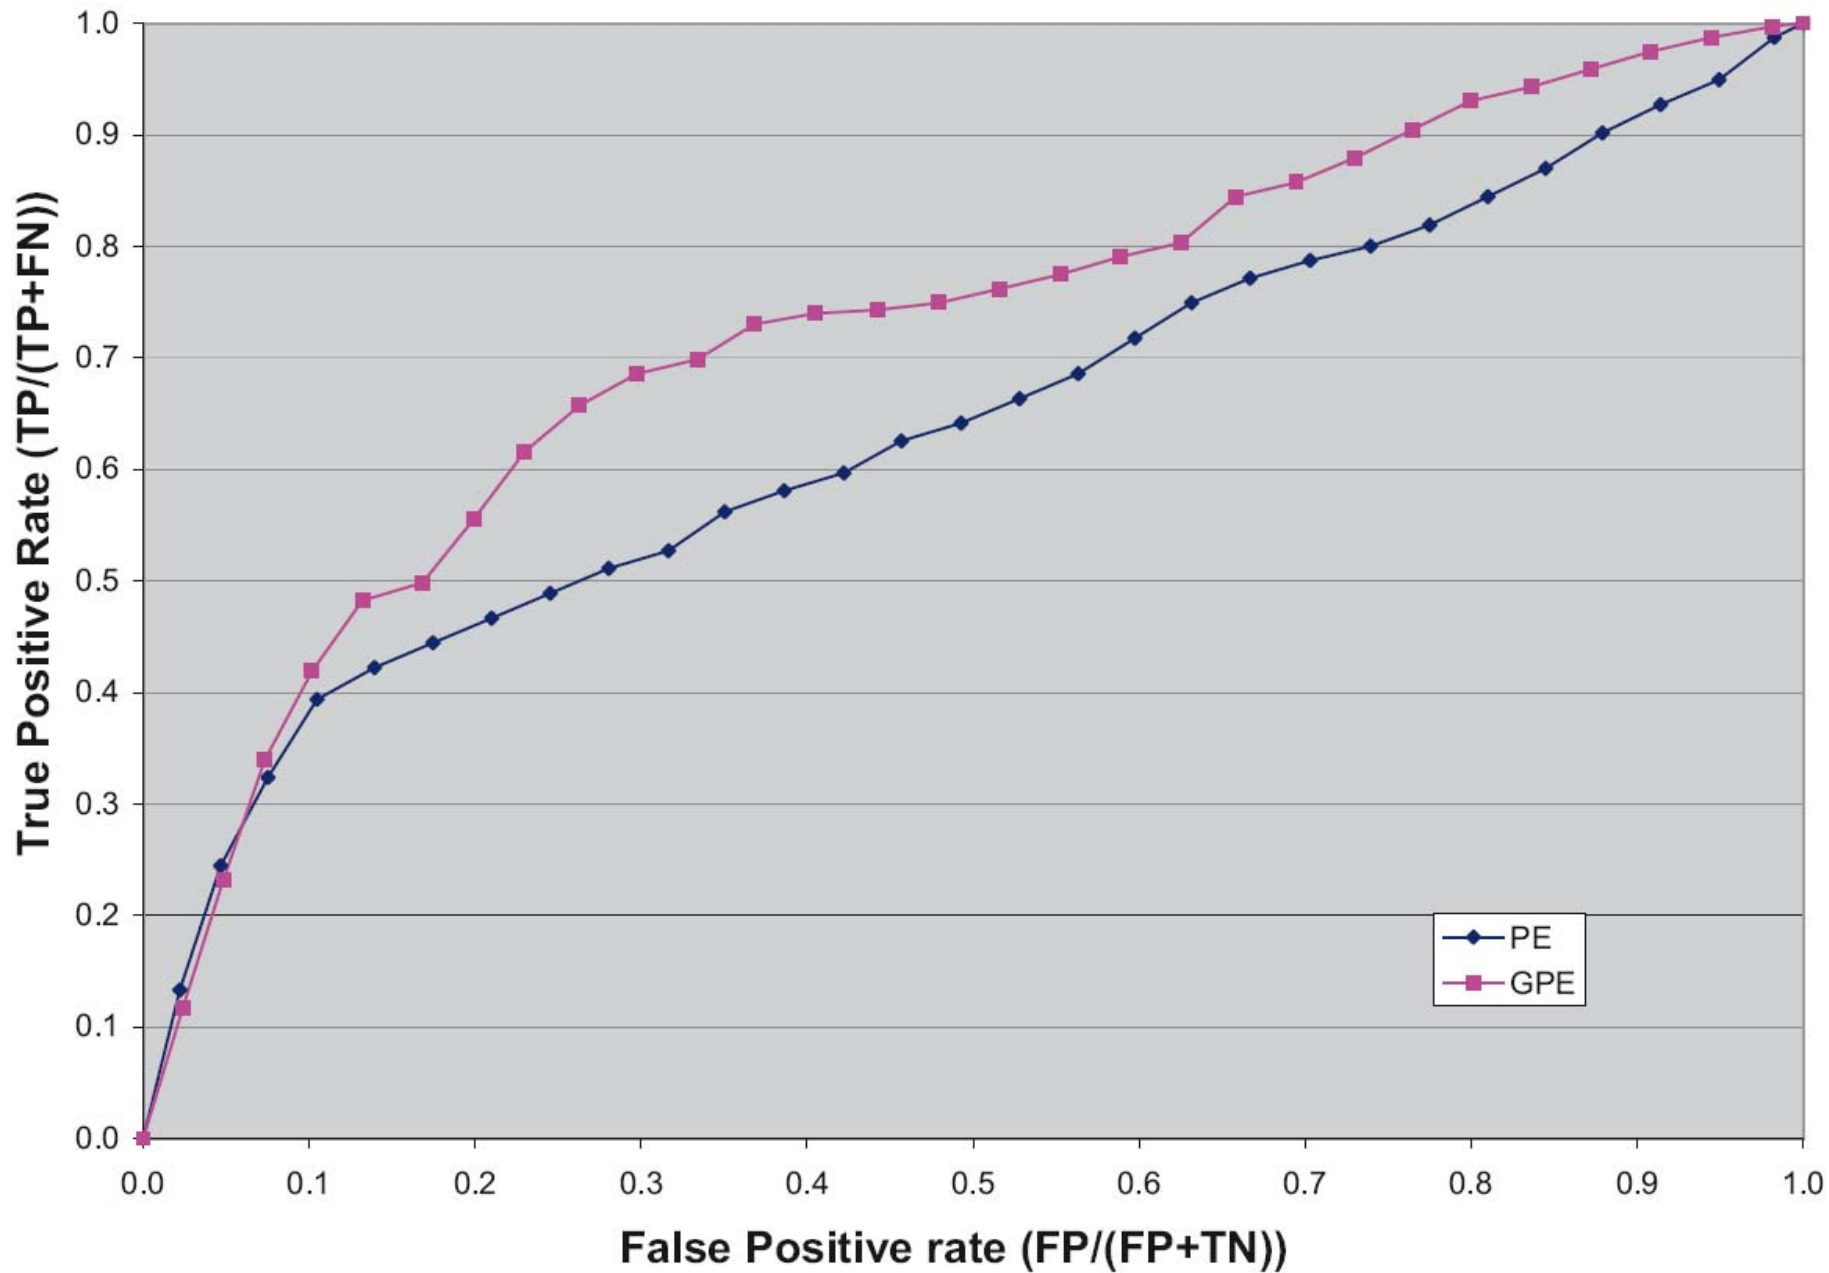

Supplement: 12859_2007_2156_MOESM10_ESM.pdf [file 12859_2007_2156_MOESM10_ESM.pdf]
